# Supplementary material for: Double threading through DNA: NMR structural study of a bis-naphthalene macrocycle bound to a thymine–thymine mismatch
Source: PubMed Central journal article supplement — Nucleic Acids Res. 2012 Feb 22;40(11):5115–28. doi: 10.1093/nar/gks067 (PMC3367172; doi:10.1093/nar/gks067), 2012-02-22
Supplement: supp_gks067_nar-02970-f-2011-File002.pdf [file supp_gks067_nar-02970-f-2011-File002.pdf]

## SUPPORTING INFORMATION

### **Double Threading through DNA: NMR Structural Study of a Bis-Naphthalene Macrocycle Bound to a Thymine–Thymine Mismatch**

*Muriel Jourdan,<sup>\*,†</sup> Anton Granzhan,<sup>‡</sup> Regis Guillot,<sup>§</sup> Pascal Dumy<sup>†</sup> and Marie-Paule Teulade-Fichou<sup>\*,‡</sup>*

<sup>†</sup> CNRS UMR5250, ICMG FR2607, Département de Chimie Moléculaire, Université Joseph Fourier, 570 rue de la Chimie, 38041 Grenoble Cedex 9, France

<sup>‡</sup> CNRS UMR176, Institut Curie, Centre de Recherche, 91405 Orsay, France

<sup>§</sup> CNRS UMR8182, Institut de Chimie Moléculaire et des Matériaux d'Orsay, Université Paris-Sud XI, 91405 Orsay, France

**Table S1.**  $^1\text{H}$  and  $^{31}\text{P}$  chemical shifts (ppm) of TT-DNA duplex at 10 °C.

| DNA Base   | H8   | H6   | H5/Me/H2 | H1'  | H2'  | H2'' | H3'  | H4'  | H5'/H5''        | NH    | NH <sub>2</sub> | $^{31}\text{P}$ |
|------------|------|------|----------|------|------|------|------|------|-----------------|-------|-----------------|-----------------|
| <b>C1</b>  | –    | 7.70 | 5.94     | 5.78 | 2.12 | 2.50 | 4.75 | 4.09 | 3.76            | –     | 7.13/8.14       | –               |
| <b>G2</b>  | 8.05 | –    | –        | 6.06 | 2.75 | 2.86 | 5.02 | 4.42 | 4.15/4.07       | 12.94 | –               | –4.62           |
| <b>T3</b>  | –    | 7.34 | 1.45     | 6.10 | 2.19 | 2.54 | 4.90 | 4.28 | 4.19            | 13.86 | –               | –4.51           |
| <b>C4</b>  | –    | 7.46 | 5.62     | 5.62 | 2.04 | 2.43 | 4.84 | 4.13 | na <sup>a</sup> | –     | 6.96/8.52       | –4.84           |
| <b>G5</b>  | 7.92 | –    | –        | 6.00 | 2.60 | 2.73 | 4.83 | 4.28 | 4.12/4.07       | 13.00 | –               | –4.51           |
| <b>T6</b>  | –    | 6.95 | 1.50     | 5.52 | 1.29 | 2.00 | 4.77 | 4.30 | 4.04/4.10       | 10.56 | –               | –5.03           |
| <b>A7</b>  | 8.29 | –    | 7.79     | 6.07 | 2.92 | 2.92 | 5.04 | 4.21 | na              | –     | –               | –4.61           |
| <b>G8</b>  | 7.63 | –    | –        | 5.88 | 2.51 | 2.73 | 4.88 | 4.40 | na              | 12.82 | –               | –4.51           |
| <b>T9</b>  | –    | 7.17 | 1.29     | 5.88 | 2.04 | 2.46 | 4.89 | 4.22 | na              | 13.79 | –               | –4.84           |
| <b>G10</b> | 7.92 | –    | –        | 5.96 | 2.65 | 2.75 | 5.01 | 4.40 | na              | 12.94 | –               | –4.82           |
| <b>C11</b> | –    | 7.48 | 5.45     | 6.21 | 2.21 | 2.21 | 4.52 | 4.28 | 4.09/4.13       | –     | 6.77/8.27       | –4.50           |
| <b>G12</b> | 7.98 | –    | –        | 5.99 | 2.65 | 2.81 | 4.87 | 4.27 | 3.73/3.73       | 13.12 | –               | –               |
| <b>C13</b> | –    | 7.48 | 5.45     | 5.66 | 2.16 | 2.47 | 4.90 | 4.23 | 4.15            | –     | 6.62/8.53       | –5.03           |
| <b>A14</b> | 8.34 | –    | 7.80     | 6.29 | 2.81 | 2.95 | 5.07 | 4.49 | 4.12            | –     | –               | –4.50           |
| <b>C15</b> | –    | 7.34 | 5.26     | 5.85 | 2.06 | 2.55 | 4.70 | 4.28 | na              | –     | 6.80/8.07       | –4.82           |
| <b>T16</b> | –    | 7.42 | 1.57     | 6.07 | 2.19 | 2.57 | 4.86 | 4.25 | 4.12/4.12       | 13.79 | –               | –4.96           |
| <b>T17</b> | –    | 7.31 | 1.59     | 5.75 | 1.89 | 2.33 | 4.87 | 4.11 | na              | 10.61 | –               | –5.14           |
| <b>C18</b> | –    | 7.68 | 5.75     | 5.01 | 2.42 | 2.42 | 4.88 | 4.21 | na              | –     | 7.13/8.47       | na              |
| <b>G19</b> | 7.93 | –    | –        | 5.66 | 2.72 | 2.83 | 5.05 | 4.35 | na              | 12.82 | –               | –3.72           |
| <b>A20</b> | 8.24 | –    | 7.92     | 6.24 | 2.69 | 2.92 | 5.06 | 4.48 | 4.24/4.18       | –     | –               | –4.87           |
| <b>C21</b> | –    | 7.26 | 5.31     | 5.63 | 1.87 | 2.30 | 4.82 | 4.26 | 4.13            | –     | 6.77/8.39       | –4.84           |
| <b>G22</b> | 7.93 | –    | –        | 6.17 | 2.62 | 2.37 | 4.69 | 4.19 | 4.11            | 12.92 | –               | –4.51           |

<sup>a</sup> na: not assigned

**Table S2.**  $^1\text{H}$  and  $^{31}\text{P}$  chemical shifts of the **2,7-BisNP**–TT-DNA complex. Assignments are at 10 °C for sample in  $\text{D}_2\text{O}$ , 10 °C or 5 °C for exchangeable protons in 90%  $\text{H}_2\text{O}$  / 10%  $\text{D}_2\text{O}$ .

| DNA Base   | H8   | H6   | H5/Me/H2 | H1'  | H2'  | H2'' | H3'  | H4'             | NH                          | NH <sub>2</sub> | $^{31}\text{P}$ |
|------------|------|------|----------|------|------|------|------|-----------------|-----------------------------|-----------------|-----------------|
| <b>C1</b>  | –    | 7.70 | 5.94     | 5.77 | 2.12 | 2.48 | 4.75 | 4.08            | –                           | 7.12/8.14       | -               |
| <b>G2</b>  | 8.02 | –    | –        | 6.03 | 2.72 | 2.83 | 4.87 | 4.39            | 12.90                       | –               | –4.67           |
| <b>T3</b>  | –    | 7.27 | 1.40     | 6.03 | 2.12 | 2.47 | 4.88 | 4.25            | 13.72                       | –               | –4.63           |
| <b>C4</b>  | –    | 7.26 | 5.50     | 5.62 | 2.04 | 2.13 | 4.73 | 4.15            | –                           | 6.90/8.50       | –4.88           |
| <b>G5</b>  | 7.91 | –    | –        | 6.07 | 2.57 | 2.86 | 5.10 | na <sup>a</sup> | 11.63                       | –               | na              |
| <b>T6</b>  | –    | 7.16 | 1.40     | 5.50 | 1.50 | 2.12 | 4.75 | 4.17            | 10.56 or 10.49 <sup>b</sup> | –               | na              |
| <b>A7</b>  | 7.88 | –    | na       | 6.04 | 2.89 | 2.89 | 4.88 | 4.31            | –                           | –               | –4.23           |
| <b>G8</b>  | 7.80 | –    | –        | 5.95 | 2.57 | 2.75 | 4.47 | 4.23            | 12.44                       | –               | –4.91           |
| <b>T9</b>  | –    | 7.25 | 1.34     | 5.90 | 2.12 | 2.50 | 4.91 | 4.25            | 13.72                       | –               | na              |
| <b>G10</b> | 7.92 | –    | –        | 5.96 | 2.65 | 2.75 | 5.01 | 4.38            | 12.89                       | –               | –4.82           |
| <b>C11</b> | –    | 7.48 | 5.48     | 6.21 | 2.18 | 2.18 | 4.51 | 4.14            | –                           | 6.77/8.26       | –4.58           |
| <b>G12</b> | 7.97 | –    | –        | 5.99 | 2.66 | 2.80 | 4.85 | 4.24            | 13.10                       | –               | -               |
| <b>C13</b> | –    | 7.48 | 5.43     | 5.69 | 2.19 | 2.47 | 4.90 | 4.23            | –                           | 6.59/8.48       | na              |
| <b>A14</b> | 8.25 | –    | 7.77     | 6.22 | 2.71 | 2.85 | 5.08 | 4.44            | –                           | –               | na              |
| <b>C15</b> | –    | 7.15 | 5.07     | 5.78 | 2.32 | 1.72 | 4.70 | 4.28            | –                           | 6.65/8.02       | na              |
| <b>T16</b> | –    | 7.11 | 1.11     | 6.10 | 2.20 | 2.40 | 4.75 | 4.24            | 12.82                       | –               | na              |
| <b>T17</b> | –    | 7.89 | 2.04     | 5.97 | 2.42 | 2.55 | 5.04 | 4.12            | 10.56 or 10.49 <sup>b</sup> | –               | na              |
| <b>C18</b> | –    | 7.65 | 5.92     | 5.42 | 2.19 | 2.37 | 4.76 | 4.22            | –                           | 6.95/7.84       | na              |
| <b>G19</b> | 7.92 | –    | –        | 5.54 | 2.73 | 2.78 | 5.03 | 4.37            | 12.71                       | –               | na              |
| <b>A20</b> | 8.23 | –    | 7.88     | 6.25 | 2.70 | 2.91 | 5.06 | 4.49            | –                           | –               | –4.76           |
| <b>C21</b> | –    | 7.26 | 5.30     | 5.63 | 1.87 | 2.30 | 4.83 | 4.26            | –                           | 6.75/8.37       | na              |
| <b>G22</b> | 7.92 | –    | –        | 6.16 | 2.62 | 2.36 | 4.67 | 4.19            | 12.90                       | –               | –4.56           |

<sup>a</sup> na: not assigned; <sup>b</sup> not differentiated.

**Table S3.** Table of distance restraints used for the molecular dynamics of the free TT-DNA duplex. The values are in Å. (a) distance in the final structure; (b) upper or lower restraint; (c) deviation from the upper or lower restraint in the final structure. The deviations are highlighted as followed: yellow (0.2–0.3 Å), grey (0.3–0.5 Å) and red (> 0.5 Å).

| First atom | Last atom    |     | current value (a) | upper/lower restraint (b) | deviation (c) |          |                |     |       |       |       |
|------------|--------------|-----|-------------------|---------------------------|---------------|----------|----------------|-----|-------|-------|-------|
| H1' DC5    | 1 -- H6 DC5  | 1:  | 3.625             | 3.800                     | 0.000         | *H73 DT  | 9 -- H1' DG    | 8:  | 4.115 | 3.840 | 0.275 |
| H2'1 DC5   | 1 -- H1' DC5 | 1:  | 2.442             | 2.520                     | 0.000         | *H73 DT  | 9 -- H8 DG     | 8:  | 2.689 | 2.880 | 0.191 |
| H2'1 DC5   | 1 -- H6 DC5  | 1:  | 2.898             | 3.600                     | 0.000         | *H73 DT  | 9 -- H6 DT     | 9:  | 2.426 | 2.450 | 0.024 |
| H2'1 DC5   | 1 -- H8 DG   | 2:  | 1.940             | 2.050                     | 0.110         | H2'1 DG  | 10 -- H5 DC3   | 11: | 2.171 | 2.610 | 0.000 |
| H2'2 DC5   | 1 -- H1' DC5 | 1:  | 3.048             | 3.210                     | 0.000         | H2'1 DG  | 10 -- H6 DC3   | 11: | 2.687 | 2.610 | 0.077 |
| H2'2 DC5   | 1 -- H6 DC5  | 1:  | 2.082             | 2.510                     | 0.000         | H8 DG    | 10 -- H1' DG   | 10: | 3.843 | 4.000 | 0.000 |
| H2'2 DC5   | 1 -- H8 DG   | 2:  | 3.582             | 3.440                     | 0.142         | H8 DG    | 10 -- H2'1 DG  | 10: | 3.096 | 3.000 | 0.096 |
| H5 DC5     | 1 -- H6 DC5  | 1:  | 2.428             | 2.450                     | 0.000         | H8 DG    | 10 -- H2'2 DG  | 10: | 2.258 | 2.220 | 0.038 |
| H2'1 DG    | 2 -- H8 DG   | 2:  | 2.458             | 2.270                     | 0.188         | H8 DG    | 10 -- H2'1 DT  | 9:  | 2.045 | 2.490 | 0.000 |
| H2'1 DG    | 2 -- H6 DT   | 3:  | 2.242             | 2.400                     | 0.158         | H8 DG    | 10 -- H2'2 DT  | 9:  | 3.560 | 3.700 | 0.000 |
| H2'2 DG    | 2 -- H8 DG   | 2:  | 2.153             | 2.380                     | 0.000         | H8 DG    | 10 -- H6 DT    | 9:  | 3.970 | 4.000 | 0.030 |
| H2'2 DG    | 2 -- H6 DT   | 3:  | 3.861             | 3.700                     | 0.161         | H1' DC3  | 11 -- H5 DC3   | 11: | 5.134 | 5.000 | 0.134 |
| H8 DG      | 2 -- H1' DC5 | 1:  | 2.816             | 2.720                     | 0.096         | H1' DC3  | 11 -- H6 DC3   | 11: | 3.626 | 3.720 | 0.000 |
| H8 DG      | 2 -- H1' DG  | 2:  | 3.653             | 4.000                     | 0.000         | H2'1 DC3 | 11 -- H1' DC3  | 11: | 2.171 | 2.060 | 0.111 |
| H8 DG      | 2 -- H6 DT   | 3:  | 4.162             | 5.000                     | 0.000         | H2'1 DC3 | 11 -- H6 DC3   | 11: | 3.181 | 3.000 | 0.181 |
| H1' DT     | 3 -- H6 DT   | 3:  | 3.750             | 3.700                     | 0.050         | H2'2 DC3 | 11 -- H1' DC3  | 11: | 2.975 | 3.000 | 0.000 |
| H1' DT     | 3 -- H6 DC   | 4:  | 3.315             | 3.300                     | 0.015         | H2'2 DC3 | 11 -- H6 DC3   | 11: | 1.938 | 2.190 | 0.000 |
| H2'1 DT    | 3 -- H6 DT   | 3:  | 3.374             | 3.500                     | 0.000         | H2'2 DC3 | 11 -- H2'1 DC3 | 11: | 4.895 | 5.000 | 0.000 |
| H2'1 DT    | 3 -- H6 DC   | 4:  | 2.045             | 2.220                     | 0.175         | H5 DC3   | 11 -- H2'2 DC3 | 11: | 4.125 | 4.000 | 0.125 |
| H2'2 DT    | 3 -- H6 DT   | 3:  | 2.238             | 2.350                     | 0.000         | H6 DC3   | 11 -- H5 DG5   | 11: | 2.363 | 2.450 | 0.000 |
| H2'2 DT    | 3 -- H6 DC   | 4:  | 3.727             | 3.700                     | 0.027         | H1' DG5  | 12 -- H8 DG5   | 12: | 3.662 | 3.800 | 0.000 |
| H6 DT      | 3 -- H1' DG  | 2:  | 2.470             | 2.520                     | 0.000         | H2'1 DG5 | 12 -- H8 DG5   | 12: | 2.828 | 2.870 | 0.058 |
| H6 DT      | 3 -- H5 DC   | 4:  | 3.803             | 3.800                     | 0.003         | H8 DG5   | 12 -- H2'2 DG5 | 12: | 1.864 | 2.210 | 0.000 |
| *H73 DT    | 3 -- H8 DG   | 2:  | 2.931             | 3.210                     | 0.000         | H1' DC   | 13 -- H8 DA    | 14: | 2.841 | 2.750 | 0.091 |
| *H73 DT    | 3 -- H6 DT   | 3:  | 2.740             | 3.070                     | 0.000         | H2'1 DC  | 13 -- H1' DC   | 13: | 2.340 | 2.620 | 0.000 |
| H2'1 DC    | 4 -- H6 DC   | 4:  | 3.020             | 3.000                     | 0.020         | H2'1 DC  | 13 -- H6 DC    | 13: | 3.443 | 3.330 | 0.113 |
| H2'2 DC    | 4 -- H6 DC   | 4:  | 2.080             | 2.590                     | 0.000         | H2'1 DC  | 13 -- H8 DA    | 14: | 2.111 | 2.280 | 0.169 |
| H6 DC      | 4 -- H1' DC  | 4:  | 3.677             | 3.900                     | 0.000         | H2'2 DC  | 13 -- H5 DC    | 13: | 4.045 | 3.970 | 0.075 |
| H6 DC      | 4 -- H5 DC   | 4:  | 2.438             | 2.450                     | 0.000         | H2'2 DC  | 13 -- H6 DC    | 13: | 2.076 | 2.510 | 0.000 |
| H8 DG      | 5 -- H1' DC  | 4:  | 2.498             | 2.410                     | 0.088         | H2'2 DC  | 13 -- H8 DA    | 14: | 3.741 | 3.630 | 0.111 |
| H8 DG      | 5 -- H2'1 DC | 4:  | 2.107             | 2.490                     | 0.000         | H6 DC    | 13 -- H2'2 DG5 | 12: | 2.914 | 2.630 | 0.284 |
| H8 DG      | 5 -- H2'2 DC | 4:  | 3.802             | 3.700                     | 0.102         | H2'1 DA  | 14 -- H5 DC    | 15: | 3.076 | 3.050 | 0.026 |
| H8 DG      | 5 -- H6 DC   | 4:  | 4.638             | 5.000                     | 0.000         | H2'2 DA  | 14 -- H5 DC    | 15: | 2.555 | 2.930 | 0.000 |
| H8 DG      | 5 -- H1' DG  | 5:  | 3.901             | 3.900                     | 0.001         | H8 DA    | 14 -- H1' DA   | 14: | 3.796 | 3.660 | 0.136 |
| H8 DG      | 5 -- H2'1 DG | 5:  | 3.604             | 3.700                     | 0.000         | H8 DA    | 14 -- H2'2 DA  | 14: | 2.468 | 2.370 | 0.098 |
| H8 DG      | 5 -- H2'2 DG | 5:  | 2.353             | 2.390                     | 0.000         | H8 DA    | 14 -- H5 DC    | 15: | 3.161 | 3.060 | 0.101 |
| H2'1 DT    | 6 -- H1' DT  | 6:  | 2.323             | 2.600                     | 0.000         | H1' DC   | 15 -- H2'2 DC  | 15: | 2.653 | 2.390 | 0.263 |
| H2'2 DT    | 6 -- H1' DT  | 6:  | 2.858             | 2.440                     | 0.418         | H1' DC   | 15 -- H6 DC    | 15: | 3.330 | 2.980 | 0.350 |
| H6 DT      | 6 -- H1' DG  | 5:  | 2.886             | 2.790                     | 0.096         | H1' DC   | 15 -- H6 DT    | 16: | 3.005 | 2.910 | 0.095 |
| H6 DT      | 6 -- H2'1 DG | 5:  | 2.126             | 2.390                     | 0.264         | H1' DC   | 15 -- *H73 DT  | 16: | 4.228 | 3.990 | 0.238 |
| H6 DT      | 6 -- H2'2 DG | 5:  | 3.744             | 3.700                     | 0.044         | H5 DC    | 15 -- H1' DA   | 14: | 3.375 | 3.230 | 0.145 |
| H6 DT      | 6 -- H8 DG   | 5:  | 4.832             | 5.000                     | 0.000         | H6 DC    | 15 -- H1' DA   | 14: | 2.962 | 2.830 | 0.132 |
| H6 DT      | 6 -- H1' DT  | 6:  | 3.495             | 3.700                     | 0.000         | H6 DC    | 15 -- H2'2 DA  | 14: | 2.967 | 2.740 | 0.227 |
| H6 DT      | 6 -- H2'1 DT | 6:  | 2.575             | 2.490                     | 0.085         | H6 DC    | 15 -- H2'1 DC  | 15: | 3.397 | 3.000 | 0.397 |
| H6 DT      | 6 -- H2'2 DT | 6:  | 2.124             | 2.300                     | 0.179         | H6 DC    | 15 -- H2'2 DC  | 15: | 2.138 | 2.350 | 0.000 |
| H6 DT      | 6 -- *H73 DT | 6:  | 2.776             | 3.170                     | 0.000         | H6 DC    | 15 -- H5 DC    | 15: | 2.473 | 2.370 | 0.103 |
| *H73 DT    | 6 -- H8 DG   | 5:  | 3.551             | 3.470                     | 0.081         | H2'1 DT  | 16 -- H6 DT    | 16: | 3.257 | 3.000 | 0.257 |
| H1' DA     | 7 -- H8 DG   | 8:  | 2.808             | 2.660                     | 0.148         | H6 DT    | 16 -- H2'1 DC  | 15: | 2.802 | 2.970 | 0.968 |
| H2'1 DA    | 7 -- H8 DA   | 7:  | 3.240             | 3.170                     | 0.070         | H6 DT    | 16 -- H2'2 DC  | 15: | 2.832 | 2.440 | 0.392 |
| H2'1 DA    | 7 -- H8 DG   | 8:  | 2.279             | 2.770                     | 0.000         | H6 DT    | 16 -- H1' DT   | 16: | 3.708 | 3.790 | 0.000 |
| H2'2 DA    | 7 -- H8 DA   | 7:  | 2.051             | 2.160                     | 0.000         | H6 DT    | 16 -- H2'2 DT  | 16: | 2.140 | 2.440 | 0.000 |
| H2'2 DA    | 7 -- H8 DG   | 8:  | 3.768             | 3.770                     | 0.000         | *H73 DT  | 16 -- H5 DC    | 15: | 3.422 | 3.580 | 0.000 |
| H8 DA      | 7 -- H1' DA  | 7:  | 3.642             | 3.470                     | 0.172         | *H73 DT  | 16 -- H6 DC    | 15: | 2.870 | 3.490 | 0.000 |
| H8 DA      | 7 -- H8 DG   | 8:  | 4.387             | 5.000                     | 0.000         | *H73 DT  | 16 -- H6 DT    | 16: | 2.681 | 3.120 | 0.000 |
| H1' DG     | 8 -- H2'1 DG | 8:  | 2.108             | 2.610                     | 0.000         | H1' DT   | 17 -- H6 DC    | 18: | 3.263 | 3.150 | 0.113 |
| H2'2 DG    | 8 -- H1' DG  | 8:  | 2.739             | 2.460                     | 0.279         | H2'1 DT  | 17 -- H5 DC    | 18: | 3.145 | 3.050 | 0.095 |
| H2'2 DG    | 8 -- H8 DG   | 8:  | 2.068             | 2.210                     | 0.142         | H2'1 DT  | 17 -- H6 DC    | 18: | 2.159 | 2.570 | 0.411 |
| H2'2 DG    | 8 -- H6 DT   | 9:  | 2.990             | 3.610                     | 0.000         | H2'2 DT  | 17 -- H6 DC    | 18: | 2.998 | 2.900 | 0.098 |
| H8 DG      | 8 -- H1' DG  | 8:  | 3.515             | 3.920                     | 0.000         | H6 DT    | 17 -- H2'1 DT  | 16: | 2.750 | 2.730 | 0.020 |
| H8 DG      | 8 -- H2'1 DG | 8:  | 3.479             | 3.710                     | 0.000         | H6 DT    | 17 -- H2'2 DT  | 16: | 2.694 | 2.640 | 0.054 |
| H1' DT     | 9 -- H8 DG   | 10: | 2.823             | 2.740                     | 0.083         | H6 DT    | 17 -- H6 DT    | 16: | 3.225 | 2.910 | 0.315 |
| H1' DT     | 9 -- H2'1 DT | 9:  | 2.458             | 2.510                     | 0.000         | H6 DT    | 17 -- H1' DT   | 17: | 3.200 | 2.520 | 0.680 |
| H2'1 DT    | 9 -- H6 DT   | 9:  | 3.102             | 3.000                     | 0.102         | H6 DT    | 17 -- H2'1 DT  | 17: | 3.149 | 2.580 | 0.569 |
| H2'2 DT    | 9 -- H6 DT   | 9:  | 2.062             | 2.390                     | 0.000         | H6 DT    | 17 -- H2'2 DT  | 17: | 1.878 | 2.140 | 0.262 |
| H6 DT      | 9 -- H2'1 DG | 8:  | 2.238             | 2.690                     | 0.000         | H6 DT    | 17 -- H3' DT   | 17: | 2.769 | 2.630 | 0.139 |
| H6 DT      | 9 -- H8 DG   | 8:  | 3.490             | 3.190                     | 0.309         | H6 DT    | 17 -- *H73 DT  | 17: | 2.830 | 3.190 | 0.000 |
| *H73 DT    | 9 -- H8 DG   | 10: | 4.972             | 4.820                     | 0.152         | H6 DT    | 17 -- H5 DC    | 18: | 3.268 | 3.080 | 0.188 |
|            |              |     |                   |                           |               | H1' DC   | 18 -- H6 DC    | 18: | 3.480 | 3.380 | 0.100 |
|            |              |     |                   |                           |               | H5 DC    | 18 -- H2'2 DT  | 17: | 2.755 | 3.000 | 0.000 |
|            |              |     |                   |                           |               | H5 DC    | 18 -- *H73 DT  | 17: | 3.371 | 4.160 | 0.000 |
|            |              |     |                   |                           |               | H5 DC    | 18 -- H6 DC    | 18: | 2.451 | 2.440 | 0.011 |
|            |              |     |                   |                           |               | H6 DC    | 18 -- H2'1 DC  | 18: | 2.584 | 2.390 | 0.194 |

|      |     |    |    |      |     |     |        |        |       |
|------|-----|----|----|------|-----|-----|--------|--------|-------|
| H6   | DC  | 18 | -- | H2'2 | DC  | 18: | 1.924  | 2.720  | 0.796 |
| H6   | DC  | 18 | -- | H8   | DG  | 19: | 5.237  | 5.000  | 0.237 |
| H1'  | DG  | 19 | -- | H2'2 | DG  | 19: | 2.778  | 2.530  | 0.248 |
| H1'  | DG  | 19 | -- | H8   | DG  | 19: | 3.618  | 3.480  | 0.138 |
| H1'  | DG  | 19 | -- | H8   | DA  | 20: | 2.819  | 2.670  | 0.149 |
| H2'1 | DG  | 19 | -- | H8   | DG  | 19: | 3.371  | 3.000  | 0.371 |
| H2'2 | DG  | 19 | -- | H8   | DG  | 19: | 1.986  | 2.380  | 0.000 |
| H2'1 | DA  | 20 | -- | H1'  | DA  | 20: | 2.019  | 2.100  | 0.081 |
| H2'2 | DA  | 20 | -- | H1'  | DA  | 20: | 2.739  | 2.540  | 0.199 |
| H2'2 | DA  | 20 | -- | H8   | DA  | 20: | 2.073  | 2.430  | 0.000 |
| H2'2 | DA  | 20 | -- | H5   | DC  | 21: | 3.003  | 2.950  | 0.053 |
| H2'2 | DA  | 20 | -- | H6   | DC  | 21: | 3.321  | 2.830  | 0.491 |
| H3'  | DA  | 20 | -- | H1'  | DA  | 20: | 3.246  | 2.920  | 0.326 |
| H8   | DA  | 20 | -- | H2'2 | DG  | 19: | 2.839  | 2.590  | 0.249 |
| H8   | DA  | 20 | -- | H8   | DG  | 19: | 3.730  | 4.000  | 0.270 |
| H8   | DA  | 20 | -- | H1'  | DA  | 20: | 3.216  | 3.410  | 0.194 |
| H8   | DA  | 20 | -- | H2'1 | DA  | 20: | 2.572  | 2.270  | 0.302 |
| H8   | DA  | 20 | -- | H5   | DC  | 21: | 2.699  | 3.060  | 0.361 |
| H1'  | DC  | 21 | -- | H2'1 | DC  | 21: | 2.191  | 2.550  | 0.000 |
| H2'1 | DC  | 21 | -- | H6   | DC  | 21: | 2.602  | 2.440  | 0.162 |
| H2'2 | DC  | 21 | -- | H6   | DC  | 21: | 2.088  | 2.580  | 0.000 |
| H5   | DC  | 21 | -- | H1'  | DA  | 20: | 3.349  | 3.240  | 0.109 |
| H5   | DC  | 21 | -- | H2'1 | DA  | 20: | 2.027  | 2.420  | 0.393 |
| H5   | DC  | 21 | -- | H6   | DC  | 21: | 2.422  | 2.310  | 0.112 |
| H6   | DC  | 21 | -- | H1'  | DA  | 20: | 3.004  | 2.910  | 0.094 |
| H6   | DC  | 21 | -- | H2'1 | DA  | 20: | 1.888  | 2.380  | 0.492 |
| H6   | DC  | 21 | -- | H8   | DG3 | 22: | 4.815  | 5.000  | 0.000 |
| H1'  | DG3 | 22 | -- | H2'1 | DG3 | 22: | 2.182  | 2.120  | 0.062 |
| H1'  | DG3 | 22 | -- | H2'2 | DG3 | 22: | 2.940  | 3.000  | 0.000 |
| H1'  | DG3 | 22 | -- | H8   | DG3 | 22: | 3.168  | 3.000  | 0.168 |
| H2'1 | DG3 | 22 | -- | H8   | DG3 | 22: | 2.680  | 3.000  | 0.000 |
| H2'2 | DG3 | 22 | -- | H8   | DG3 | 22: | 2.050  | 1.880  | 0.170 |
| C4'  | DC  | 4  | -- | C4'  | DG3 | 22: | 15.083 | 15.000 | 0.083 |
| C4'  | DC  | 4  | -- | C4'  | DC  | 21: | 10.239 | 15.000 | 0.000 |
| C4'  | DG  | 5  | -- | C4'  | DC  | 21: | 12.524 | 15.000 | 0.000 |
| C4'  | DG  | 5  | -- | C4'  | DA  | 20: | 10.467 | 15.000 | 0.000 |
| C4'  | DT  | 6  | -- | C4'  | DG  | 19: | 11.512 | 15.000 | 0.000 |
| C4'  | DA  | 7  | -- | C4'  | DG  | 19: | 13.476 | 15.000 | 0.000 |
| C4'  | DA  | 7  | -- | C4'  | DC  | 18: | 12.323 | 15.000 | 0.000 |
| C4'  | DG  | 8  | -- | C4'  | DC  | 18: | 13.944 | 15.000 | 0.000 |
| C4'  | DT  | 9  | -- | C4'  | DT  | 17: | 13.457 | 15.000 | 0.000 |
| C4'  | DT  | 9  | -- | C4'  | DT  | 16: | 10.579 | 15.000 | 0.000 |
| C4'  | DG  | 10 | -- | C4'  | DT  | 16: | 11.826 | 15.000 | 0.000 |
| C4'  | DG  | 10 | -- | C4'  | DC  | 15: | 10.831 | 15.000 | 0.000 |
| C4'  | DC3 | 11 | -- | C4'  | DC  | 15: | 13.165 | 15.000 | 0.000 |
| C4'  | DC3 | 11 | -- | C4'  | DA  | 14: | 10.906 | 15.000 | 0.000 |
| H42  | DC5 | 1  | -- | O6   | DG3 | 22: | 1.813  | 2.000  | 0.000 |
| N3   | DC5 | 1  | -- | H1   | DG3 | 22: | 1.948  | 2.040  | 0.000 |
| N3   | DC5 | 1  | -- | N1   | DG3 | 22: | 2.943  | 3.050  | 0.000 |
| N4   | DC5 | 1  | -- | O6   | DG3 | 22: | 2.825  | 3.010  | 0.000 |
| O2   | DC5 | 1  | -- | H22  | DG3 | 22: | 1.871  | 1.950  | 0.000 |
| H1   | DG  | 2  | -- | N3   | DC  | 21: | 1.841  | 2.040  | 0.000 |
| H22  | DG  | 2  | -- | O2   | DC  | 21: | 1.762  | 1.950  | 0.000 |
| N1   | DG  | 2  | -- | N3   | DC  | 21: | 2.849  | 2.850  | 0.001 |
| O6   | DG  | 2  | -- | H42  | DC  | 21: | 1.875  | 2.000  | 0.000 |
| O6   | DG  | 2  | -- | N4   | DC  | 21: | 2.892  | 3.010  | 0.000 |
| H3   | DT  | 3  | -- | N1   | DA  | 20: | 1.922  | 1.910  | 0.012 |
| N3   | DT  | 3  | -- | N1   | DA  | 20: | 2.928  | 2.920  | 0.008 |
| O4   | DT  | 3  | -- | H61  | DA  | 20: | 2.061  | 2.040  | 0.021 |
| H42  | DC  | 4  | -- | O6   | DG  | 19: | 1.796  | 1.800  | 0.004 |
| N3   | DC  | 4  | -- | H1   | DG  | 19: | 1.908  | 2.040  | 0.000 |
| N3   | DC  | 4  | -- | N1   | DG  | 19: | 2.889  | 3.050  | 0.000 |
| N4   | DC  | 4  | -- | O6   | DG  | 19: | 2.791  | 2.810  | 0.019 |
| O2   | DC  | 4  | -- | H22  | DG  | 19: | 1.878  | 1.950  | 0.000 |
| H1   | DG  | 5  | -- | N3   | DC  | 18: | 1.883  | 2.040  | 0.000 |
| H22  | DG  | 5  | -- | O2   | DC  | 18: | 1.777  | 1.950  | 0.000 |
| N1   | DG  | 5  | -- | N3   | DC  | 18: | 2.878  | 3.050  | 0.000 |
| O6   | DG  | 5  | -- | H42  | DC  | 18: | 1.870  | 2.000  | 0.000 |
| O6   | DG  | 5  | -- | N4   | DC  | 18: | 2.868  | 3.010  | 0.000 |
| H61  | DA  | 7  | -- | O4   | DT  | 16: | 2.065  | 2.040  | 0.025 |
| N1   | DA  | 7  | -- | H3   | DT  | 16: | 1.826  | 1.910  | 0.000 |
| N1   | DA  | 7  | -- | N3   | DT  | 16: | 2.775  | 2.920  | 0.000 |
| H1   | DG  | 8  | -- | N3   | DC  | 15: | 1.979  | 2.040  | 0.000 |
| H22  | DG  | 8  | -- | O2   | DC  | 15: | 1.788  | 1.950  | 0.000 |
| N1   | DG  | 8  | -- | N3   | DC  | 15: | 2.965  | 3.050  | 0.000 |
| O6   | DG  | 8  | -- | H42  | DC  | 15: | 2.007  | 2.000  | 0.007 |
| O6   | DG  | 8  | -- | N4   | DC  | 15: | 3.019  | 3.010  | 0.009 |
| H3   | DT  | 9  | -- | N1   | DA  | 14: | 1.916  | 1.910  | 0.006 |
| N3   | DT  | 9  | -- | N1   | DA  | 14: | 2.923  | 2.920  | 0.003 |
| O4   | DT  | 9  | -- | H61  | DA  | 14: | 1.975  | 2.040  | 0.000 |
| H1   | DG  | 10 | -- | N3   | DC  | 13: | 1.923  | 2.040  | 0.000 |
| H22  | DG  | 10 | -- | O2   | DC  | 13: | 1.800  | 1.950  | 0.000 |
| N1   | DG  | 10 | -- | N3   | DC  | 13: | 2.918  | 3.050  | 0.000 |

|     |     |    |    |     |     |     |       |       |       |
|-----|-----|----|----|-----|-----|-----|-------|-------|-------|
| O6  | DG  | 10 | -- | H42 | DC  | 13: | 1.846 | 2.000 | 0.000 |
| O6  | DG  | 10 | -- | N4  | DC  | 13: | 2.869 | 3.010 | 0.000 |
| H42 | DC3 | 11 | -- | O6  | DG5 | 12: | 1.856 | 2.000 | 0.000 |
| N3  | DC3 | 11 | -- | H1  | DG5 | 12: | 1.944 | 2.040 | 0.000 |
| N3  | DC3 | 11 | -- | N1  | DG5 | 12: | 2.898 | 3.050 | 0.000 |
| N4  | DC3 | 11 | -- | O6  | DG5 | 12: | 2.860 | 3.010 | 0.000 |
| O2  | DC3 | 11 | -- | H22 | DG5 | 12: | 1.758 | 1.950 | 0.000 |

**Table S4.** Table of distance restraints used for the molecular dynamics of the **2,7-BisNP–TT-DNA** complex. **2,7-BisNP** is called ‘BNP’ in the table. The values are in Å: (a) distance in the final structure; b) upper or lower restraint; (c) deviation from the upper or lower restraint in the final structure. The deviations are highlighted as followed: yellow (0.2–0.3 Å), grey (0.3–0.5 Å) and red (> 0.5 Å).

| First atom | Last atom |                | current value (a) | upper/lower restraint (b) | deviation (c) |
|------------|-----------|----------------|-------------------|---------------------------|---------------|
| H5         | BNP       | -- H1 DG       | 5: 3.425          | 4.000                     | 0.000         |
| H5         | BNP       | -- H5 DC       | 18: 4.910         | 5.000                     | 0.000         |
| H6         | BNP       | -- H1 DG       | 5: 3.119          | 4.000                     | 0.000         |
| H1         | BNP       | -- H1' DT      | 16: 3.880         | 4.000                     | 0.190         |
| H1         | BNP       | -- *H73 DT     | 16: 5.521         | 5.000                     | 0.521         |
| H1         | BNP       | -- H1' DT      | 17: 2.505         | 4.000                     | 0.000         |
| H1         | BNP       | -- H2'1 DT     | 17: 2.081         | 4.000                     | 0.000         |
| H1         | BNP       | -- H2'2 DT     | 17: 3.756         | 4.000                     | 0.000         |
| H2         | BNP       | -- H1' DT      | 17: 2.162         | 3.000                     | 0.000         |
| H2         | BNP       | -- H2'1 DT     | 17: 2.312         | 3.000                     | 0.000         |
| H2         | BNP       | -- H2'2 DT     | 17: 3.214         | 4.000                     | 0.000         |
| H2         | BNP       | -- H1' DT      | 16: 5.070         | 5.000                     | 0.070         |
| H2         | BNP       | -- *H73 DT     | 16: 4.108         | 4.000                     | 0.108         |
| H7         | BNP       | -- H1' DT      | 16: 3.548         | 3.000                     | 0.548         |
| H7         | BNP       | -- H2'1 DT     | 16: 3.557         | 3.000                     | 0.557         |
| H7         | BNP       | -- H2'2 DT     | 16: 2.709         | 3.000                     | 0.000         |
| H7         | BNP       | -- *H73 DT     | 16: 3.611         | 4.000                     | 0.000         |
| H8         | BNP       | -- H1' DT      | 16: 2.849         | 4.000                     | 0.000         |
| H8         | BNP       | -- H2'1 DT     | 16: 4.283         | 4.000                     | 0.283         |
| H8         | BNP       | -- H2'2 DT     | 16: 3.962         | 4.000                     | 0.000         |
| H8         | BNP       | -- *H73 DT     | 16: 5.104         | 4.000                     | 1.104         |
| CH2)18     | BNP       | -- *H73 DT     | 16: 5.090         | 5.000                     | 0.090         |
| CH2)18     | BNP       | -- *H73 DT     | 16: 3.939         | 5.000                     | 0.000         |
| CH2)24     | BNP       | -- H1' DA      | 7: 3.970          | 4.000                     | 0.000         |
| CH2)24     | BNP       | -- H1' DA      | 7: 4.049          | 4.000                     | 0.049         |
| H1'        | DC5       | 1 -- H6 DC5    | 1: 3.734          | 3.800                     | 0.000         |
| H2'1       | DC5       | 1 -- H1' DC5   | 1: 2.370          | 2.520                     | 0.000         |
| H2'1       | DC5       | 1 -- H6 DC5    | 1: 3.366          | 3.600                     | 0.000         |
| H2'1       | DC5       | 1 -- H8 DG     | 2: 1.999          | 2.050                     | 0.051         |
| H2'2       | DC5       | 1 -- H1' DC5   | 1: 3.030          | 3.210                     | 0.000         |
| H2'2       | DC5       | 1 -- H6 DC5    | 1: 2.110          | 2.510                     | 0.000         |
| H2'2       | DC5       | 1 -- H8 DG     | 2: 3.608          | 3.440                     | 0.168         |
| H5         | DC5       | 1 -- H6 DC5    | 1: 2.429          | 2.450                     | 0.000         |
| H2'1       | DG        | 2 -- H8 DG     | 2: 2.476          | 2.270                     | 0.206         |
| H2'1       | DG        | 2 -- H6 DT     | 3: 2.348          | 2.400                     | 0.052         |
| H2'2       | DG        | 2 -- H8 DG     | 2: 2.168          | 2.380                     | 0.000         |
| H2'2       | DG        | 2 -- H6 DT     | 3: 3.936          | 3.700                     | 0.236         |
| H8         | DG        | 2 -- H1' DC5   | 1: 2.811          | 2.720                     | 0.091         |
| H8         | DG        | 2 -- H1' DG    | 2: 3.619          | 4.000                     | 0.000         |
| H8         | DG        | 2 -- H6 DT     | 3: 4.136          | 5.000                     | 0.000         |
| H1'        | DT        | 3 -- H6 DT     | 3: 3.730          | 3.700                     | 0.030         |
| H1'        | DT        | 3 -- H6 DC     | 4: 3.352          | 3.300                     | 0.052         |
| H2'1       | DT        | 3 -- H6 DT     | 3: 3.177          | 3.500                     | 0.000         |
| H2'1       | DT        | 3 -- H6 DC     | 4: 2.089          | 2.220                     | 0.131         |
| H2'2       | DT        | 3 -- H6 DT     | 3: 2.258          | 2.350                     | 0.000         |
| H2'2       | DT        | 3 -- H6 DC     | 4: 3.834          | 3.700                     | 0.134         |
| H6         | DT        | 3 -- H1' DG    | 2: 2.424          | 2.520                     | 0.000         |
| H6         | DT        | 3 -- H5 DC     | 4: 3.418          | 3.800                     | 0.000         |
| *H73       | DT        | 3 -- H8 DG     | 2: 2.790          | 3.210                     | 0.000         |
| *H73       | DT        | 3 -- H6 DT     | 3: 2.705          | 3.070                     | 0.000         |
| H2'1       | DC        | 4 -- H6 DC     | 4: 2.986          | 3.000                     | 0.000         |
| H2'2       | DC        | 4 -- H6 DC     | 4: 2.092          | 2.590                     | 0.000         |
| H6         | DC        | 4 -- H1' DC    | 4: 3.671          | 3.900                     | 0.000         |
| H6         | DC        | 4 -- H5 DC     | 4: 2.423          | 2.450                     | 0.000         |
| H8         | DG        | 5 -- H1' DC    | 4: 2.527          | 2.410                     | 0.117         |
| H8         | DG        | 5 -- H2'1 DC   | 4: 2.211          | 2.490                     | 0.000         |
| H8         | DG        | 5 -- H2'2 DC   | 4: 3.749          | 3.700                     | 0.049         |
| H8         | DG        | 5 -- H6 DC     | 4: 3.973          | 4.000                     | 0.027         |
| H8         | DG        | 5 -- H1' DG    | 5: 3.884          | 3.900                     | 0.000         |
| H8         | DG        | 5 -- H2'1 DG   | 5: 3.748          | 3.700                     | 0.048         |
| H8         | DG        | 5 -- H2'2 DG   | 5: 2.335          | 2.390                     | 0.000         |
| H6         | DT        | 6 -- H1' DG    | 5: 2.872          | 2.790                     | 0.082         |
| H6         | DT        | 6 -- H2'1 DG   | 5: 2.384          | 2.390                     | 0.006         |
| H6         | DT        | 6 -- H2'2 DG   | 5: 3.618          | 3.700                     | 0.000         |
| H6         | DT        | 6 -- H8 DG     | 5: 4.611          | 5.000                     | 0.000         |
| H1'        | DG        | 8 -- H2'1 DG   | 8: 2.064          | 2.090                     | 0.026         |
| H2'2       | DG        | 8 -- H1' DG    | 8: 2.754          | 2.460                     | 0.294         |
| H2'2       | DG        | 8 -- H8 DG     | 8: 2.148          | 2.210                     | 0.062         |
| H2'2       | DG        | 8 -- H6 DT     | 9: 3.620          | 3.610                     | 0.010         |
| H8         | DG        | 8 -- H1' DG    | 8: 3.208          | 3.920                     | 0.000         |
| H8         | DG        | 8 -- H2'1 DG   | 8: 3.145          | 3.710                     | 0.000         |
| H1'        | DT        | 9 -- H8 DG     | 10: 2.896         | 2.740                     | 0.156         |
| H1'        | DT        | 9 -- H2'1 DT   | 9: 2.344          | 2.510                     | 0.000         |
| H2'1       | DT        | 9 -- H6 DT     | 9: 3.138          | 3.000                     | 0.138         |
| H2'2       | DT        | 9 -- H6 DT     | 9: 2.056          | 2.390                     | 0.000         |
| H6         | DT        | 9 -- H2'1 DG   | 8: 2.520          | 2.690                     | 0.000         |
| H6         | DT        | 9 -- H8 DG     | 8: 3.414          | 3.190                     | 0.224         |
| *H73       | DT        | 9 -- H8 DG     | 10: 4.873         | 4.820                     | 0.053         |
| *H73       | DT        | 9 -- H1' DG    | 8: 4.124          | 3.840                     | 0.284         |
| *H73       | DT        | 9 -- H8 DG     | 8: 2.735          | 2.880                     | 0.165         |
| *H73       | DT        | 9 -- H6 DT     | 9: 2.471          | 2.450                     | 0.000         |
| H2'1       | DG        | 10 -- H5 DC3   | 11: 2.584         | 2.610                     | 0.000         |
| H2'1       | DG        | 10 -- H6 DC3   | 11: 2.557         | 2.610                     | 0.000         |
| H8         | DG        | 10 -- H1' DG   | 10: 3.811         | 4.000                     | 0.000         |
| H8         | DG        | 10 -- H2'1 DG  | 10: 3.130         | 3.000                     | 0.130         |
| H8         | DG        | 10 -- H2'2 DG  | 10: 2.170         | 2.220                     | 0.000         |
| H8         | DG        | 10 -- H2'1 DT  | 9: 2.371          | 2.490                     | 0.000         |
| H8         | DG        | 10 -- H2'2 DT  | 9: 3.729          | 3.700                     | 0.029         |
| H8         | DG        | 10 -- H6 DT    | 9: 3.923          | 4.000                     | 0.077         |
| H1'        | DC3       | 11 -- H5 DC3   | 11: 5.144         | 5.000                     | 0.144         |
| H1'        | DC3       | 11 -- H6 DC3   | 11: 3.614         | 3.720                     | 0.000         |
| H2'1       | DC3       | 11 -- H1' DC3  | 11: 2.192         | 2.060                     | 0.132         |
| H2'1       | DC3       | 11 -- H6 DC3   | 11: 3.096         | 3.000                     | 0.096         |
| H2'2       | DC3       | 11 -- H1' DC3  | 11: 2.983         | 3.000                     | 0.000         |
| H2'2       | DC3       | 11 -- H6 DC3   | 11: 1.964         | 2.190                     | 0.000         |
| H5         | DC3       | 11 -- H2'1 DC3 | 11: 4.757         | 5.000                     | 0.000         |
| H5         | DC3       | 11 -- H2'2 DC3 | 11: 4.163         | 4.000                     | 0.163         |
| H6         | DC3       | 11 -- H5 DC3   | 11: 2.359         | 2.450                     | 0.000         |
| H1'        | DG5       | 12 -- H8 DG5   | 12: 3.692         | 3.800                     | 0.000         |
| H2'1       | DG5       | 12 -- H8 DG5   | 12: 3.013         | 2.870                     | 0.143         |
| H8         | DG5       | 12 -- H2'2 DG5 | 12: 1.852         | 2.210                     | 0.000         |
| H1'        | DC        | 13 -- H8 DA    | 14: 2.866         | 2.750                     | 0.116         |
| H2'1       | DC        | 13 -- H1' DC   | 13: 2.373         | 2.620                     | 0.000         |
| H2'1       | DC        | 13 -- H6 DC    | 13: 3.392         | 3.330                     | 0.062         |
| H2'1       | DC        | 13 -- H8 DA    | 14: 2.196         | 2.280                     | 0.084         |
| H2'2       | DC        | 13 -- H5 DC    | 13: 4.141         | 3.970                     | 0.171         |
| H2'2       | DC        | 13 -- H6 DC    | 13: 2.041         | 2.510                     | 0.000         |
| H2'2       | DC        | 13 -- H8 DA    | 14: 3.746         | 3.630                     | 0.116         |
| H6         | DC        | 13 -- H2'2 DG5 | 12: 2.900         | 2.630                     | 0.270         |
| H2'1       | DA        | 14 -- H5 DC    | 15: 3.142         | 3.050                     | 0.092         |
| H2'2       | DA        | 14 -- H5 DC    | 15: 2.698         | 2.930                     | 0.000         |
| H8         | DA        | 14 -- H1' DA   | 14: 3.790         | 3.660                     | 0.130         |
| H8         | DA        | 14 -- H2'2 DA  | 14: 2.413         | 2.370                     | 0.043         |
| H8         | DA        | 14 -- H5 DC    | 15: 3.055         | 3.060                     | 0.005         |
| H1'        | DC        | 15 -- H2'2 DC  | 15: 2.768         | 2.390                     | 0.378         |
| H1'        | DC        | 15 -- H6 DC    | 15: 3.307         | 2.980                     | 0.327         |
| H1'        | DC        | 15 -- H6 DT    | 16: 3.144         | 2.910                     | 0.234         |
| H1'        | DC        | 15 -- *H73 DT  | 16: 4.179         | 3.990                     | 0.189         |
| H5         | DC        | 15 -- H1' DA   | 14: 3.354         | 3.230                     | 0.124         |
| H6         | DC        | 15 -- H1' DA   | 14: 2.952         | 2.830                     | 0.122         |
| H6         | DC        | 15 -- H2'2 DA  | 14: 2.933         | 2.740                     | 0.193         |
| H6         | DC        | 15 -- H2'1 DC  | 15: 3.102         | 3.000                     | 0.102         |
| H6         | DC        | 15 -- H2'2 DC  | 15: 1.925         | 2.350                     | 0.000         |
| H6         | DC        | 15 -- H5 DC    | 15: 2.390         | 2.370                     | 0.020         |
| H1'        | DC        | 18 -- H6 DC    | 18: 3.443         | 3.380                     | 0.063         |
| H5         | DC        | 18 -- H6 DC    | 18: 2.418         | 2.440                     | 0.000         |
| H6         | DC        | 18 -- H2'1 DC  | 18: 2.485         | 2.390                     | 0.095         |
| H6         | DC        | 18 -- H2'2 DC  | 18: 2.494         | 2.720                     | 0.226         |
| H6         | DC        | 18 -- H8 DG    | 19: 3.974         | 4.000                     | 0.026         |
| H1'        | DG        | 19 -- H2'2 DG  | 19: 2.754         | 2.530                     | 0.224         |
| H1'        | DG        | 19 -- H8 DG    | 19: 3.555         | 3.480                     | 0.075         |
| H1'        | DG        | 19 -- H8 DA    | 20: 2.818         | 2.670                     | 0.148         |
| H2'1       | DG        | 19 -- H8 DG    | 19: 3.425         | 3.000                     | 0.425         |
| H2'2       | DG        | 19 -- H8 DG    | 19: 1.932         | 2.380                     | 0.000         |
| H2'1       | DA        | 20 -- H1' DA   | 20: 2.015         | 2.100                     | 0.085         |
| H2'2       | DA        | 20 -- H1' DA   | 20: 2.769         | 2.540                     | 0.229         |
| H2'2       | DA        | 20 -- H8 DA    | 20: 1.941         | 2.430                     | 0.000         |
| H2'2       | DA        | 20 -- H5 DC    | 21: 3.150         | 2.950                     | 0.200         |

|      |     |    |    |      |     |     |        |        |       |
|------|-----|----|----|------|-----|-----|--------|--------|-------|
| H2'2 | DA  | 20 | -- | H6   | DC  | 21: | 3.547  | 2.830  | 0.717 |
| H3'  | DA  | 20 | -- | H1'  | DA  | 20: | 3.321  | 2.920  | 0.401 |
| H8   | DA  | 20 | -- | H2'2 | DG  | 19: | 2.790  | 2.590  | 0.200 |
| H8   | DA  | 20 | -- | H8   | DG  | 19: | 3.860  | 4.000  | 0.140 |
| H8   | DA  | 20 | -- | H1'  | DA  | 20: | 3.212  | 3.410  | 0.198 |
| H8   | DA  | 20 | -- | H2'1 | DA  | 20: | 2.645  | 2.270  | 0.375 |
| H8   | DA  | 20 | -- | H5   | DC  | 21: | 2.934  | 3.060  | 0.126 |
| H1'  | DC  | 21 | -- | H2'1 | DC  | 21: | 2.146  | 2.550  | 0.000 |
| H2'1 | DC  | 21 | -- | H6   | DC  | 21: | 2.525  | 2.440  | 0.085 |
| H2'2 | DC  | 21 | -- | H6   | DC  | 21: | 2.073  | 2.580  | 0.000 |
| H5   | DC  | 21 | -- | H1'  | DA  | 20: | 3.406  | 3.240  | 0.166 |
| H5   | DC  | 21 | -- | H2'1 | DA  | 20: | 2.300  | 2.420  | 0.120 |
| H5   | DC  | 21 | -- | H6   | DC  | 21: | 2.385  | 2.310  | 0.075 |
| H6   | DC  | 21 | -- | H1'  | DA  | 20: | 2.930  | 2.910  | 0.020 |
| H6   | DC  | 21 | -- | H2'1 | DA  | 20: | 2.058  | 2.380  | 0.322 |
| H6   | DC  | 21 | -- | H8   | DG3 | 22: | 4.858  | 5.000  | 0.000 |
| H1'  | DG3 | 22 | -- | H2'1 | DG3 | 22: | 2.199  | 2.120  | 0.079 |
| H1'  | DG3 | 22 | -- | H2'2 | DG3 | 22: | 2.947  | 3.000  | 0.000 |
| H1'  | DG3 | 22 | -- | H8   | DG3 | 22: | 3.273  | 3.000  | 0.273 |
| H2'1 | DG3 | 22 | -- | H8   | DG3 | 22: | 2.511  | 3.000  | 0.000 |
| H2'2 | DG3 | 22 | -- | H8   | DG3 | 22: | 2.074  | 1.880  | 0.194 |
| C4'  | DC  | 4  | -- | C4'  | DG3 | 22: | 14.743 | 15.000 | 0.000 |
| C4'  | DC  | 4  | -- | C4'  | DC  | 21: | 10.661 | 15.000 | 0.000 |
| C4'  | DG  | 5  | -- | C4'  | DC  | 21: | 13.374 | 15.000 | 0.000 |
| C4'  | DG  | 5  | -- | C4'  | DA  | 20: | 11.347 | 15.000 | 0.000 |
| C4'  | DT  | 6  | -- | C4'  | DG  | 19: | 10.149 | 15.000 | 0.000 |
| C4'  | DA  | 7  | -- | C4'  | DG  | 19: | 12.639 | 15.000 | 0.000 |
| C4'  | DA  | 7  | -- | C4'  | DC  | 18: | 10.265 | 15.000 | 0.000 |
| C4'  | DG  | 8  | -- | C4'  | DC  | 18: | 13.483 | 15.000 | 0.000 |
| C4'  | DG  | 10 | -- | C4'  | DC  | 15: | 10.577 | 15.000 | 0.000 |
| C4'  | DC3 | 11 | -- | C4'  | DC  | 15: | 12.782 | 15.000 | 0.000 |
| C4'  | DC3 | 11 | -- | C4'  | DA  | 14: | 9.808  | 15.000 | 0.000 |
| H42  | DC5 | 1  | -- | O6   | DG3 | 22: | 1.873  | 2.000  | 0.000 |
| N3   | DC5 | 1  | -- | H1   | DG3 | 22: | 1.940  | 2.040  | 0.000 |
| N3   | DC5 | 1  | -- | N1   | DG3 | 22: | 2.922  | 3.050  | 0.000 |
| N4   | DC5 | 1  | -- | O6   | DG3 | 22: | 2.876  | 3.010  | 0.000 |
| O2   | DC5 | 1  | -- | H22  | DG3 | 22: | 1.806  | 1.950  | 0.000 |
| H1   | DG  | 2  | -- | N3   | DC  | 21: | 1.928  | 2.040  | 0.000 |
| H22  | DG  | 2  | -- | O2   | DC  | 21: | 1.864  | 1.950  | 0.000 |
| N1   | DG  | 2  | -- | N3   | DC  | 21: | 2.935  | 3.050  | 0.000 |
| O6   | DG  | 2  | -- | H42  | DC  | 21: | 1.865  | 2.000  | 0.000 |
| O6   | DG  | 2  | -- | N4   | DC  | 21: | 2.867  | 3.010  | 0.000 |
| H3   | DT  | 3  | -- | N1   | DA  | 20: | 1.884  | 1.910  | 0.000 |
| N3   | DT  | 3  | -- | N1   | DA  | 20: | 2.891  | 2.920  | 0.000 |
| O4   | DT  | 3  | -- | H61  | DA  | 20: | 1.859  | 2.040  | 0.000 |
| H42  | DC  | 4  | -- | O6   | DG  | 19: | 1.856  | 2.000  | 0.000 |
| N3   | DC  | 4  | -- | H1   | DG  | 19: | 1.906  | 2.040  | 0.000 |
| N3   | DC  | 4  | -- | N1   | DG  | 19: | 2.902  | 3.050  | 0.000 |
| N4   | DC  | 4  | -- | O6   | DG  | 19: | 2.859  | 3.010  | 0.000 |
| O2   | DC  | 4  | -- | H22  | DG  | 19: | 1.804  | 1.950  | 0.000 |
| H1   | DG  | 5  | -- | N3   | DC  | 18: | 1.924  | 2.040  | 0.000 |
| H22  | DG  | 5  | -- | O2   | DC  | 18: | 1.864  | 1.950  | 0.000 |
| N1   | DG  | 5  | -- | N3   | DC  | 18: | 2.891  | 3.050  | 0.000 |
| O6   | DG  | 5  | -- | H42  | DC  | 18: | 2.060  | 2.000  | 0.060 |
| O6   | DG  | 5  | -- | N4   | DC  | 18: | 2.880  | 3.010  | 0.000 |
| H61  | DA  | 7  | -- | O4   | DT  | 16: | 1.858  | 2.040  | 0.000 |
| N1   | DA  | 7  | -- | H3   | DT  | 16: | 1.980  | 1.910  | 0.070 |
| N1   | DA  | 7  | -- | N3   | DT  | 16: | 2.939  | 2.920  | 0.019 |
| H1   | DG  | 8  | -- | N3   | DC  | 15: | 1.991  | 2.040  | 0.000 |
| H22  | DG  | 8  | -- | O2   | DC  | 15: | 1.871  | 1.950  | 0.000 |
| N1   | DG  | 8  | -- | N3   | DC  | 15: | 2.934  | 3.050  | 0.000 |
| O6   | DG  | 8  | -- | H42  | DC  | 15: | 1.937  | 2.000  | 0.000 |
| O6   | DG  | 8  | -- | N4   | DC  | 15: | 2.942  | 3.010  | 0.000 |
| H3   | DT  | 9  | -- | N1   | DA  | 14: | 1.867  | 1.910  | 0.000 |
| N3   | DT  | 9  | -- | N1   | DA  | 14: | 2.859  | 2.920  | 0.000 |
| O4   | DT  | 9  | -- | H61  | DA  | 14: | 1.980  | 2.040  | 0.000 |
| H1   | DG  | 10 | -- | N3   | DC  | 13: | 1.932  | 2.040  | 0.000 |
| H22  | DG  | 10 | -- | O2   | DC  | 13: | 1.788  | 1.950  | 0.000 |
| N1   | DG  | 10 | -- | N3   | DC  | 13: | 2.924  | 3.050  | 0.000 |
| O6   | DG  | 10 | -- | H42  | DC  | 13: | 1.924  | 2.000  | 0.000 |
| O6   | DG  | 10 | -- | N4   | DC  | 13: | 2.932  | 3.010  | 0.000 |
| H42  | DC3 | 11 | -- | O6   | DG5 | 12: | 1.846  | 2.000  | 0.000 |
| N3   | DC3 | 11 | -- | H1   | DG5 | 12: | 1.969  | 2.040  | 0.000 |
| N3   | DC3 | 11 | -- | N1   | DG5 | 12: | 2.935  | 3.050  | 0.000 |
| N4   | DC3 | 11 | -- | O6   | DG5 | 12: | 2.842  | 3.010  | 0.000 |
| O2   | DC3 | 11 | -- | H22  | DG5 | 12: | 1.870  | 1.950  | 0.000 |

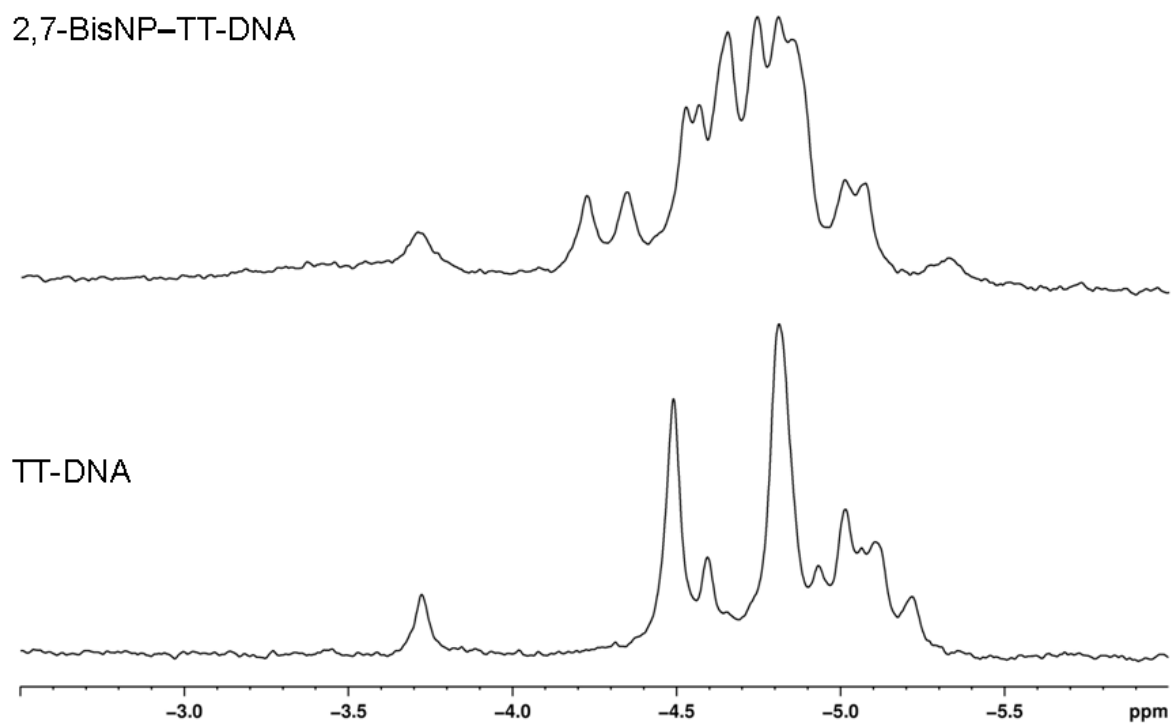

**Figure S1.** 1D  $^{31}\text{P}$  spectra of the free TT-DNA and the **2,7-BisNP**-TT-DNA complex in  $\text{D}_2\text{O}$  at  $10^\circ\text{C}$ .



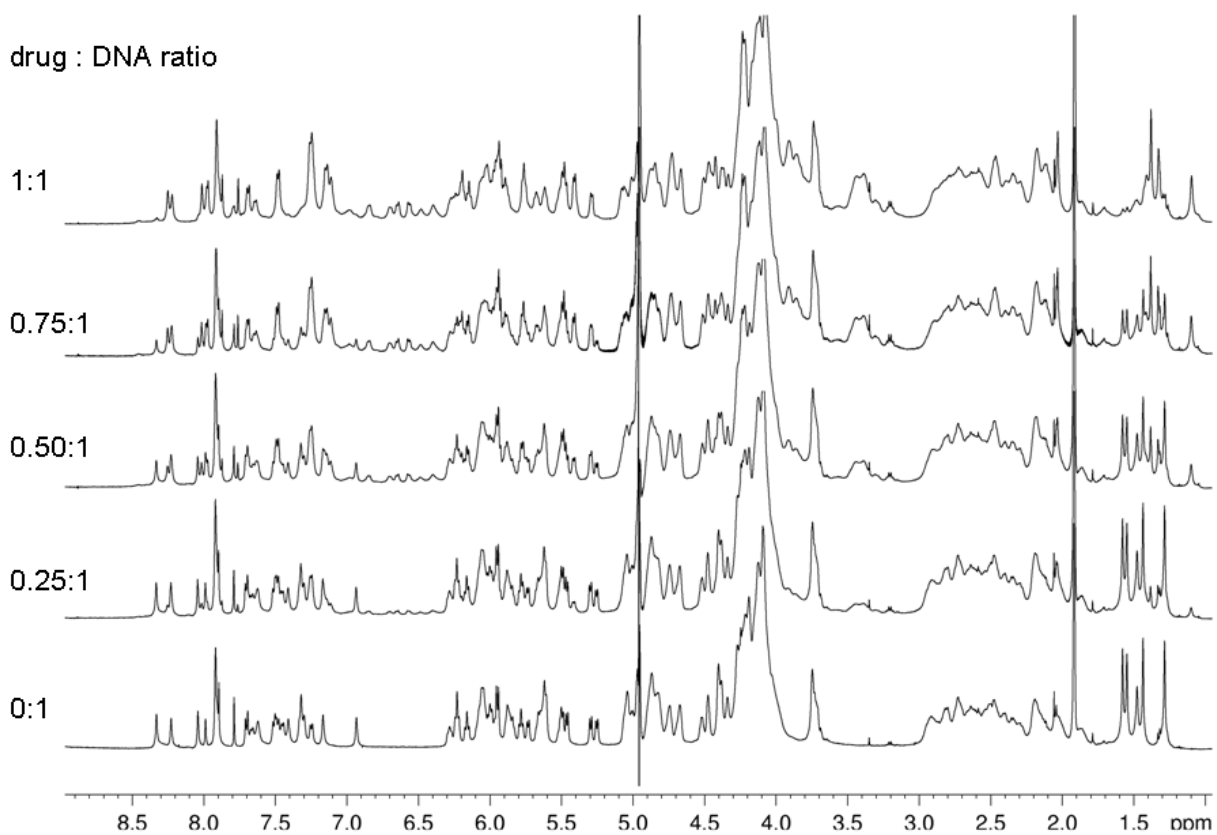

**Figure S2.** 1D NMR spectra of TT-DNA upon addition of **2,7-BisNP** in D<sub>2</sub>O, at 10 °C and pH 6. The molar ligand-to-DNA ratio is indicated for each spectrum.

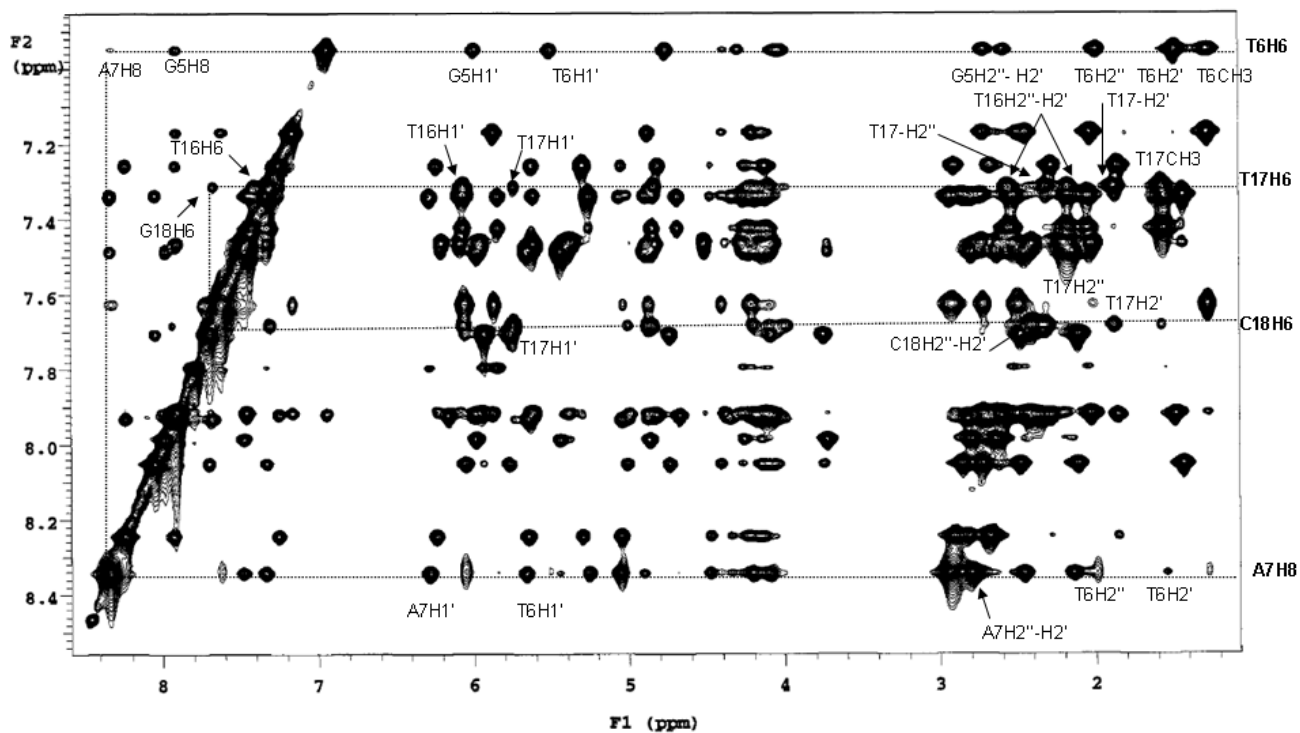

**Figure S3.** Expansion of the 250 ms NOESY spectrum of the free TT-DNA in D<sub>2</sub>O at 10 °C. Correlations are between the aromatic protons and the sugar protons. The sequential walk between the mismatched thymine T<sub>6</sub> and the adjacent bases G<sub>5</sub> and A<sub>7</sub>, and between the mismatched T<sub>17</sub> and the adjacent bases T<sub>16</sub> and C<sub>18</sub> is displayed.
